# Supplementary material for: Extracellular peptidase hunting for improvement of protein production in plant cells and roots
Source: Front Plant Sci. 2015 Feb 6;6:37. doi: 10.3389/fpls.2015.00037 (PMC4319384; doi:10.3389/fpls.2015.00037)
Supplement: Supplementary file 1 [file Data_Sheet_1.XLSX]

## Sheet: Sheet1
#	tair_id	merops_id	class	family	signalp	signalp.score	suba3.score	suba3.loc	suba3.mw	ratio.hydro	ratio.susp
1	AT1G01300	MER014523	A	A01	Y	0.763	extracellular	0.95	52.1781	0.75	0.454545
2	AT1G01900	MER015428	S	S08	Y	0.359	extracellular	1	83.2519	0	0.181818
3	AT1G02300	MER004894	C	C01	Y	0.796	extracellular	0.83	42.2655	0.625	0.727273
4	AT1G04110	MER015438	S	S08	Y	0.743	extracellular	1	83.7806	0	0
5	AT1G06260	MER012024	C	C01	Y	0.676	extracellular	0.97	37.772	0	0
6	AT1G08210	MER014127	A	A01	Y	0.539	extracellular	0.998	52.9912	0.8125	0.818182
7	AT1G09750	MER015556	A	A01	Y	0.887	extracellular	1	47.6637	0.625	0.0909091
8	AT1G11080	MER003414	S	S10	Y	0.358	extracellular	0.659	55.8422	0.5	0
9	AT1G16420	MER039468	C	C14	N	0.201	extracellular	0.342	42.5239	0.125	0
10	AT1G17430	MER036056	S	S33	N	0.24	extracellular	0.595	37.8543	1	0.454545
11	AT1G20150	MER015435	S	S08	Y	0.846	extracellular	0.976	85.7267	0	0
12	AT1G20160	MER013896	S	S08	Y	0.831	extracellular	1	81.4844	0.6875	0
13	AT1G20850	MER005574	C	C01	Y	0.717	extracellular	0.999	39.7095	0.875	0.181818
14	AT1G24140	MER005070	M	M10	Y	0.905	extracellular	0.861	43.0195	0.1875	0
15	AT1G25510	MER014524	A	A01	Y	0.65	extracellular	0.655	51.9931	0.25	0.0909091
16	AT1G28110	MER015619	S	S10	Y	0.77	extracellular	0.929	51.8056	0.9375	0.818182
17	AT1G29080	MER005600	C	C01	Y	0.512	extracellular	0.821	38.7877	0	0
18	AT1G29090	MER012026	C	C01	Y	0.707	extracellular	0.659	39.9391	0	0.181818
19	AT1G31450	MER015587	A	A01	Y	0.658	extracellular	0.984	47.9102	0	0
20	AT1G32190	MER031564	S	S09	N	0.221	extracellular	0.5	46.3951	0.75	0.454545
21	AT1G32940	MER015430	S	S08	Y	0.896	extracellular	0.936	82.9168	0.375	0
22	AT1G32950	MER015431	S	S08	Y	0.819	extracellular	0.983	82.4491	0	0
23	AT1G32960	MER015432	S	S08	Y	0.858	extracellular	0.999	83.6446	0.0625	0
24	AT1G32970	MER024767	S	S08	Y	0.86	extracellular	0.997	79.1683	0	0
25	AT1G33540	MER010959	S	S10	Y	0.811	extracellular	0.806	50.2567	0.25	0.0909091
26	AT1G44130	MER015586	A	A01	Y	0.906	extracellular	0.988	43.9624	0.0625	0.545455
27	AT1G47128	MER001693	C	C01	Y	0.855	extracellular	1	50.9689	1	1
28	AT1G59970	MER005075	M	M10	Y	0.891	extracellular	0.514	39.7623	0.8125	0.454545
29	AT1G61130	MER015612	S	S10	Y	0.753	extracellular	0.783	52.8272	0.125	0
30	AT1G62340	MER015439	S	S08	Y	0.481	extracellular	0.87	89.0708	0	0
31	AT1G64670	MER044581	S	S33	N	0.251	extracellular	1	53.4307	0.0625	0.0909091
32	AT1G64830	MER011958	A	A01	Y	0.906	extracellular	0.981	46.3425	0	0
33	AT1G66210	MER015436	S	S08	N	0.3	extracellular	0.976	81.4962	0	0.0909091
34	AT1G66220	MER015437	S	S08	N	0.31	extracellular	0.758	80.7973	0	0
35	AT1G69100	MER011981	A	A01	Y	0.854	extracellular	0.948	40.9985	0	0
36	AT1G70170	MER003418	M	M10	Y	0.927	extracellular	0.733	42.0083	0.8125	0
37	AT1G71696	MER015121	M	M14	Y	0.772	extracellular	0.711	56.0489	0.4375	0.0909091
38	AT1G71950	MER039047	S	S08	Y	0.452	extracellular	0.996	14.8527	1	1
39	AT1G73270	MER015617	S	S10	Y	0.747	extracellular	0.704	51.7296	0.625	0
40	AT1G73290	MER015618	S	S10	Y	0.825	extracellular	0.912	49.9847	0.0625	0
41	AT1G77480	MER015585	A	A01	Y	0.529	extracellular	0.627	51.2421	0.75	0.818182
42	AT1G78670	MER014655	C	C26	Y	0.872	extracellular	0.863	39.8843	0.875	0.727273
43	AT1G79720	MER011871	A	A01	Y	0.897	extracellular	0.859	52.3988	0.4375	0.0909091
44	AT2G03200	MER015559	A	A01	Y	0.819	extracellular	0.497	49.5908	0.875	0.181818
45	AT2G04160	MER004869	S	S08	Y	0.828	extracellular	1	82.8781	0.8125	0.0909091
46	AT2G05920	MER015427	S	S08	Y	0.755	extracellular	1	80.0196	1	1
47	AT2G12480	MER005616	S	S10	Y	0.791	extracellular	0.553	49.8754	0	0.0909091
48	AT2G18360	MER017033	S	S33	N	0.149	extracellular	0.682	35.5287	0.8125	0.0909091
49	AT2G22920	MER011747	S	S10	Y	0.771	extracellular	0.593	49.7071	0.375	0.0909091
50	AT2G22960	MER019232	S	S10	Y	0.844	extracellular	0.925	21.2476	0	0
51	AT2G22970	MER004653	S	S10	Y	0.809	extracellular	0.723	50.3852	0.75	0.272727
52	AT2G22990	MER004682	S	S10	Y	0.852	extracellular	0.553	52.1252	0.1875	0.181818
53	AT2G23945	MER031144	A	A01	Y	0.614	extracellular	1	51.3552	0	0
54	AT2G24000	MER011751	S	S10	Y	0.893	extracellular	0.618	53.1083	0	0
55	AT2G24280	MER003947	S	S28	Y	0.898	extracellular	0.995	56.236	0.5	0.0909091
56	AT2G24640	MER014640	C	C19	N	0.262	extracellular	0.545	75.7235	0.5625	0.636364
57	AT2G27920	MER005676	S	S10	Y	0.847	extracellular	0.722	51.7551	0.5	0.0909091
58	AT2G28010	MER011759	A	A01	Y	0.864	extracellular	0.743	43.1251	0	0
59	AT2G28030	MER011756	A	A01	Y	0.683	extracellular	0.756	42.8617	0	0
60	AT2G33530	MER011739	S	S10	Y	0.819	extracellular	0.94	51.8863	0.4375	0.363636
61	AT2G35770	MER011762	S	S10	Y	0.833	extracellular	0.857	52.1011	0.5	0
62	AT2G42980	MER015574	A	A01	Y	0.732	extracellular	0.962	58.652	0.125	0.0909091
63	AT3G02110	MER006019	S	S10	Y	0.774	extracellular	0.972	53.4034	0.1875	0.0909091
64	AT3G03230	MER213916	S	S33	Y	0.651	extracellular	0.979	38.3193	0	0
65	AT3G03240	MER201227	S	S33	Y	0.635	extracellular	0.988	38.5386	0	0.181818
66	AT3G10450	MER015654	S	S10	Y	0.832	extracellular	0.819	49.568	0	0.727273
67	AT3G14240	MER006049	S	S08	Y	0.84	extracellular	0.999	82.5888	0.9375	0.909091
68	AT3G17180	MER015651	S	S10	Y	0.718	extracellular	0.659	54.1477	0	0
69	AT3G18490	MER014035	A	A01	Y	0.873	extracellular	0.891	53.2366	0.875	0.818182
70	AT3G20015	MER014522	A	A01	Y	0.833	extracellular	0.655	50.5481	0.9375	0.0909091
71	AT3G25420	MER006005	S	S10	Y	0.687	extracellular	0.842	56.1089	0	0
72	AT3G28680	MER013950	S	S28	N	0.333	extracellular	0.998	22.6352	0	0
73	AT3G45310	MER011062	C	C01	Y	0.782	extracellular	0.882	39.5438	0.875	0.454545
74	AT3G49340	MER011081	C	C01	Y	0.816	extracellular	0.659	37.6899	0	0
75	AT3G51360	MER055967	A	A01	Y	0.612	extracellular	0.946	53.2303	0.5	0
76	AT3G52500	MER015576	A	A01	Y	0.944	extracellular	1	51.0077	0.875	0.727273
77	AT3G54240	MER036080	S	S33	Y	0.468	extracellular	0.978	39.4666	0	0
78	AT3G54400	MER015571	A	A01	Y	0.877	extracellular	1	45.4777	0.875	0.272727
79	AT3G59080	MER015568	A	A01	Y	0.857	extracellular	0.519	59.2455	0.75	0.727273
80	AT3G61820	MER012000	A	A01	Y	0.742	extracellular	1	51.464	0.875	0.818182
81	AT3G63470	MER010962	S	S10	Y	0.681	extracellular	0.898	56.2427	0.4375	0
82	AT4G00230	MER011813	S	S08	Y	0.873	extracellular	1	80.3333	0.8125	0.0909091
83	AT4G01610	MER011786	C	C01	Y	0.854	extracellular	0.999	39.4196	1	1
84	AT4G12910	MER005597	S	S10	Y	0.818	extracellular	0.997	55.8354	0.875	1
85	AT4G12920	MER015575	A	A01	Y	0.791	extracellular	0.497	43.3107	0	0
86	AT4G20430	MER005785	S	S08	Y	0.863	extracellular	0.994	91.8201	0.6875	0.454545
87	AT4G21326	MER029448	S	S08	Y	0.653	extracellular	0.987	81.511	0.0625	0.181818
88	AT4G21630	MER005774	S	S08	Y	0.675	extracellular	0.928	82.6666	0	0
89	AT4G21650	MER005775	S	S08	Y	0.725	extracellular	0.994	81.4845	0	0.0909091
90	AT4G22050	MER004655	A	A01	Y	0.71	extracellular	0.993	39.2317	0	0.181818
91	AT4G24560	MER005440	C	C19	N	0.225	extracellular	0.765	110.606	0.9375	0.727273
92	AT4G26330	MER005699	S	S08	N	0.117	extracellular	0.853	81.3371	0	0
93	AT4G30020	MER004652	S	S08	Y	0.787	extracellular	0.982	87.5094	0.375	0.818182
94	AT4G30030	MER015581	A	A01	Y	0.699	extracellular	0.633	47.2354	0	0
95	AT4G30610	MER011803	S	S10	Y	0.801	extracellular	1	52.8476	0.5	0.0909091
96	AT4G33490	MER015578	A	A01	Y	0.637	extracellular	0.915	47.4491	0.8125	0.363636
97	AT4G34980	MER004641	S	S08	Y	0.853	extracellular	0.999	81.0508	0.875	0.727273
98	AT4G36610	MER036057	S	S33	N	0.143	extracellular	0.756	35.6237	0.875	0
99	AT4G36880	MER003739	C	C01	Y	0.828	extracellular	0.891	41.6409	0.375	0
100	AT4G39370	MER014126	C	C19	N	0.186	extracellular	0.49	57.0385	0.125	0.0909091
101	AT5G02190	MER015569	A	A01	Y	0.769	extracellular	0.655	49.6811	0	0.0909091
102	AT5G03620	MER015434	S	S08	Y	0.748	extracellular	0.996	82.5991	0	0
103	AT5G07030	MER015563	A	A01	Y	0.747	extracellular	1	48.6969	0.9375	0.272727
104	AT5G10760	MER012003	A	A01	Y	0.854	extracellular	0.881	49.4761	0	0
105	AT5G10770	MER012004	A	A01	Y	0.731	extracellular	1	49.8669	0.375	0.272727
106	AT5G11940	MER014089	S	S08	Y	0.854	extracellular	0.758	82.9311	0	0.272727
107	AT5G14180	MER213803	S	S33	Y	0.459	extracellular	0.987	46.0504	0.0625	0.454545
108	AT5G22460	MER209583	S	S33	Y	0.663	extracellular	0.869	39.1003	0.0625	0.545455
109	AT5G22860	MER006067	S	S28	Y	0.676	extracellular	1	56.4574	0.125	0.0909091
110	AT5G22980	MER015679	S	S10	Y	0.745	extracellular	0.999	56.5464	0	0
111	AT5G23210	MER006018	S	S10	Y	0.907	extracellular	0.985	56.3319	0.3125	0.363636
112	AT5G24820	MER048648	A	A01	Y	0.905	extracellular	0.967	44.5773	0	0
113	AT5G33340	MER014520	A	A01	Y	0.846	extracellular	0.981	46.821	0	0
114	AT5G42230	MER015680	S	S10	N	0.321	extracellular	0.989	52.5439	0	0.0909091
115	AT5G42240	MER015681	S	S10	Y	0.836	extracellular	1	52.8769	0.5	0.818182
116	AT5G43060	MER013512	C	C01	Y	0.902	extracellular	0.705	51.2065	1	1
117	AT5G44530	MER013893	S	S08	Y	0.832	extracellular	0.974	90.6214	0.4375	0
118	AT5G45120	MER015562	A	A01	Y	0.833	extracellular	0.537	53.7512	0.0625	0
119	AT5G45640	MER014329	S	S08	Y	0.875	extracellular	0.993	82.3545	0	0
120	AT5G45650	MER014328	S	S08	Y	0.782	extracellular	0.986	85.1501	0.1875	0.0909091
121	AT5G51750	MER006048	S	S08	Y	0.722	extracellular	0.79	84.9548	0.125	0.0909091
122	AT5G58820	MER014312	S	S08	Y	0.716	extracellular	0.999	75.7008	0	0
123	AT5G58830	MER014311	S	S08	Y	0.936	extracellular	0.995	75.2273	0	0
124	AT5G59090	MER001454	S	S08	Y	0.93	extracellular	1	78.1012	0.9375	0
125	AT5G59100	MER001467	S	S08	Y	0.898	extracellular	0.999	79.6019	0	0
126	AT5G59120	MER014309	S	S08	Y	0.923	extracellular	0.999	76.8733	0	0.0909091
127	AT5G59130	MER001451	S	S08	Y	0.927	extracellular	1	78.4663	0	0
128	AT5G59810	MER014315	S	S08	Y	0.359	extracellular	0.668	83.46	0	0.272727
129	AT5G65760	MER003969	S	S28	Y	0.872	extracellular	0.973	58.5761	0.9375	0.818182
130	AT5G67090	MER006036	S	S08	Y	0.919	extracellular	0.758	79.7811	0.1875	0
131	AT5G67360	MER001368	S	S08	Y	0.823	extracellular	1	79.4196	0.9375	1
