# Supplementary material for: Extracellular peptidase hunting for improvement of protein production in plant cells and roots
Source: Front Plant Sci. 2015 Feb 6;6:37. doi: 10.3389/fpls.2015.00037 (PMC4319384; doi:10.3389/fpls.2015.00037)
Supplement: Supplementary file 2 [file Data_Sheet_2.XLSX]

## Sheet: Sheet1
GEOD	Media	Concentration	Age	Photoperiod	Light_intensity	Temperature	Purpose	Protoplasting	Array_number	full_name_exp
E-ATMX-31	Hydroponics	1/4 MS &amp; 1/4 B5	21	16	120 μE cm-2sec-1	20	General root transcriptome.	NO	9	Hydroponics-E-ATMX-31Hydroponics_age-21_purpose-General root transcriptome._Protoplasted-NO_9-arrays
E-GEOD-15189	Hydroponics	Custom media	30	10	ND	21/18	Response to Fe deprivation.	NO	22	Hydroponics-E-GEOD-15189Hydroponics_age-30_purpose-Response to Fe deprivation._Protoplasted-NO_22-arrays
E-GEOD-22114	Hydroponics	1/4 Sommerville	28	16	ND	20	Response to cadmium (200µM) treatment.	NO	6	Hydroponics-E-GEOD-22114Hydroponics_age-28_purpose-Response to cadmium (200µM) treatment._Protoplasted-NO_6-arrays
E-GEOD-24348	Hydroponics	1/4 Hoagland	35	16	150 μE cm-2sec-1	21/19	nas4x mutant profiling after iron deprivation.	NO	24	Hydroponics-E-GEOD-24348Hydroponics_age-35_purpose-nas4x mutant profiling after iron deprivation._Protoplasted-NO_24-arrays
E-GEOD-29086	Hydroponics	Custom media	24	16	150 μE cm-2sec-1	ND	Profiling of kas-1 and Tsu-1 mutants after iron deprivation.	NO	18	Hydroponics-E-GEOD-29086Hydroponics_age-24_purpose-Profiling of kas-1 and Tsu-1 mutants after iron deprivation._Protoplasted-NO_18-arrays
E-GEOD-29589	Hydroponics	1/2 Sommerville	20	16	100 μE cm-2sec-1	22	Response to nitrate and ammonium.	NO	15	Hydroponics-E-GEOD-29589Hydroponics_age-20_purpose-Response to nitrate and ammonium._Protoplasted-NO_15-arrays
E-GEOD-33790	Hydroponics	MGRL media	30	12	150 μE cm-2sec-1	22	Response to phosphate starvation.	NO	18	Hydroponics-E-GEOD-33790Hydroponics_age-30_purpose-Response to phosphate starvation._Protoplasted-NO_18-arrays
E-GEOD-34130	Hydroponics	low nitrogen	12	ND	ND	ND	Response to nitrogen in different A. thaliana accessions.	NO	42	Hydroponics-E-GEOD-34130Hydroponics_age-12_purpose-Response to nitrogen in different A. thaliana accessions. _Protoplasted-NO_42-arrays
E-GEOD-35544	Hydroponics	1 MS	15	16	100 μE cm-2sec-1	22	Root nitrate response of Ws plants and afb3-1 mutant.	NO	12	Hydroponics-E-GEOD-35544Hydroponics_age-15_purpose-Root nitrate response of Ws plants and afb3-1 mutant._Protoplasted-NO_12-arrays
E-GEOD-36789	Hydroponics	MGRL media	30	12	150 μE cm-2sec-1	22	Response to high osmotic stress.	NO	18	Hydroponics-E-GEOD-36789Hydroponics_age-30_purpose-Response to high osmotic stress._Protoplasted-NO_18-arrays
E-GEOD-43011	Hydroponics	1 MS	14	16	100 μE cm-2sec-1	22	Response of tga1/tga4 mutant to nitrate.	NO	12	Hydroponics-E-GEOD-43011Hydroponics_age-14_purpose-Response of tga1/tga4 mutant to nitrate._Protoplasted-NO_12-arrays
E-GEOD-46958	Hydroponics	liquid Richard’s medium	ND	16	80 μE cm-2sec-1	22/19	Response to gold treatment (0.125mM).	NO	6	Hydroponics-E-GEOD-46958Hydroponics_age-ND_purpose-Response to gold treatment (0.125mM)._Protoplasted-NO_6-arrays
E-GEOD-6155	Hydroponics	Hoagland	28	24	140 μE cm-2sec-1	25	Profiling of ANR1 overexpressor.	NO	7	Hydroponics-E-GEOD-6155Hydroponics_age-28_purpose-Profiling of ANR1 overexpressor._Protoplasted-NO_7-arrays
E-GEOD-7631	Hydroponics	1 MS	12	16	ND	22	Tissue-speicific response to KNO3.	YES	84	Hydroponics-E-GEOD-7631Hydroponics_age-12_purpose-Tissue-speicific response to KNO3._Protoplasted-YES_84-arrays
Not published data	Hydroponics	1N solution (Tocquin et al., 2003)	42	10	60 μE cm-2sec-1	21	Root profilling.	NO	3	Hydroponics-Fred_media_analysis_hydroponicsHydroponics_age-42_purpose-Root profilling._Protoplasted-NO_3-arrays
Not published data	Hydroponics	Commercial solution (see D'aloia et al., 2011)	49	8	60 μE cm-2sec-1	21	Response of root to photoperiodic induction of flowering.	NO	14	Hydroponics-Maria_root_induction-h16_22_32Hydroponics_age-49_purpose-Response of root to photoperiodic induction of flowering._Protoplasted-NO_14-arrays
E-GEOD-57751	Suspension Cells	ND	ND	ND	ND	ND	ND	NO	12	Suspension Cells-E-GEOD-57751Suspension Cells_age-ND_purpose-ND_Protoplasted-NO_12-arrays
E-GEOD-43551	Suspension Cells	ND	ND	ND	ND	ND	ND	NO	18	Suspension Cells-E-GEOD-43551Suspension Cells_age-ND_purpose-ND_Protoplasted-NO_18-arrays
E-GEOD-31837	Suspension Cells	ND	ND	ND	ND	ND	ND	NO	21	Suspension Cells-E-GEOD-31837Suspension Cells_age-ND_purpose-ND_Protoplasted-NO_21-arrays
E-GEOD-23301	Suspension Cells	ND	ND	ND	ND	ND	ND	NO	12	Suspension Cells-E-GEOD-23301Suspension Cells_age-ND_purpose-ND_Protoplasted-NO_12-arrays
E-GEOD-22671	Suspension Cells	ND	ND	ND	ND	ND	ND	NO	9	Suspension Cells-E-GEOD-22671Suspension Cells_age-ND_purpose-ND_Protoplasted-NO_9-arrays
E-GEOD-17824	Suspension Cells	ND	ND	ND	ND	ND	ND	NO	16	Suspension Cells-E-GEOD-17824Suspension Cells_age-ND_purpose-ND_Protoplasted-NO_16-arrays
E-GEOD-6181	Suspension Cells	ND	ND	ND	ND	ND	ND	NO	6	Suspension Cells-E-GEOD-6181Suspension Cells_age-ND_purpose-ND_Protoplasted-NO_6-arrays
E-GEOD-5750	Suspension Cells	ND	ND	ND	ND	ND	ND	NO	4	Suspension Cells-E-GEOD-5750Suspension Cells_age-ND_purpose-ND_Protoplasted-NO_4-arrays
E-GEOD-5748	Suspension Cells	ND	ND	ND	ND	ND	ND	NO	12	Suspension Cells-E-GEOD-5748Suspension Cells_age-ND_purpose-ND_Protoplasted-NO_12-arrays
E-GEOD-5747	Suspension Cells	ND	ND	ND	ND	ND	ND	NO	10	Suspension Cells-E-GEOD-5747Suspension Cells_age-ND_purpose-ND_Protoplasted-NO_10-arrays
E-GEOD-5526	Suspension Cells	ND	ND	ND	ND	ND	ND	NO	6	Suspension Cells-E-GEOD-5526Suspension Cells_age-ND_purpose-ND_Protoplasted-NO_6-arrays
